# Supplementary material for: Magnetic skyrmions and their manipulations in a 2D multiferroic CuCrP2Te6 monolayer
Source: Royal Society of Chemistry journal article supplement (doi:10.1039/d3cp05096c), 2024-01-01
Supplement: d3cp05096c1.pdf [file d3cp05096c1.pdf]

## Supporting Information

# Manipulation Magnetic Skyrmions via Two-Dimensional Multiferroics $\text{CuCrP}_2\text{Te}_6$ Monolayer

*Minghao Liu<sup>a</sup>, Tsz Lok Wan<sup>a</sup>, Kaiying Dou<sup>b</sup>, Lei Zhang<sup>c</sup>, Wei Sun<sup>d</sup>, Jiawei Jiang<sup>e</sup>, Yandong Ma<sup>b</sup>, Yuantong Gu<sup>\*a</sup> and Liangzhi Kou<sup>\*a</sup>*

<sup>a</sup>School of Mechanical, Medical and Process Engineering, Queensland University of Technology, Brisbane, QLD 4001, Australia

<sup>b</sup>School of Physics, State Key Laboratory of Crystal Materials, Shandong University, Shandanan Str. 27, Jinan 250100, P. R. China

<sup>c</sup>School of Chemistry and Physics, Queensland University of Technology, Brisbane, QLD 4001, Australia

<sup>d</sup>Shandong Provincial Key Laboratory of Preparation and Measurement of Building Materials, University of Jinan, Jinan 250022, China

<sup>e</sup>Tianjin Key Laboratory of Low Dimensional Materials Physics and Preparation Technology, School of Science, Tianjin University, Tianjin 300354, China

\*Corresponding Authors: [Yuantong.Gu@qut.edu.au](mailto:Yuantong.Gu@qut.edu.au), [liangzhi.kou@qut.edu.au](mailto:liangzhi.kou@qut.edu.au)

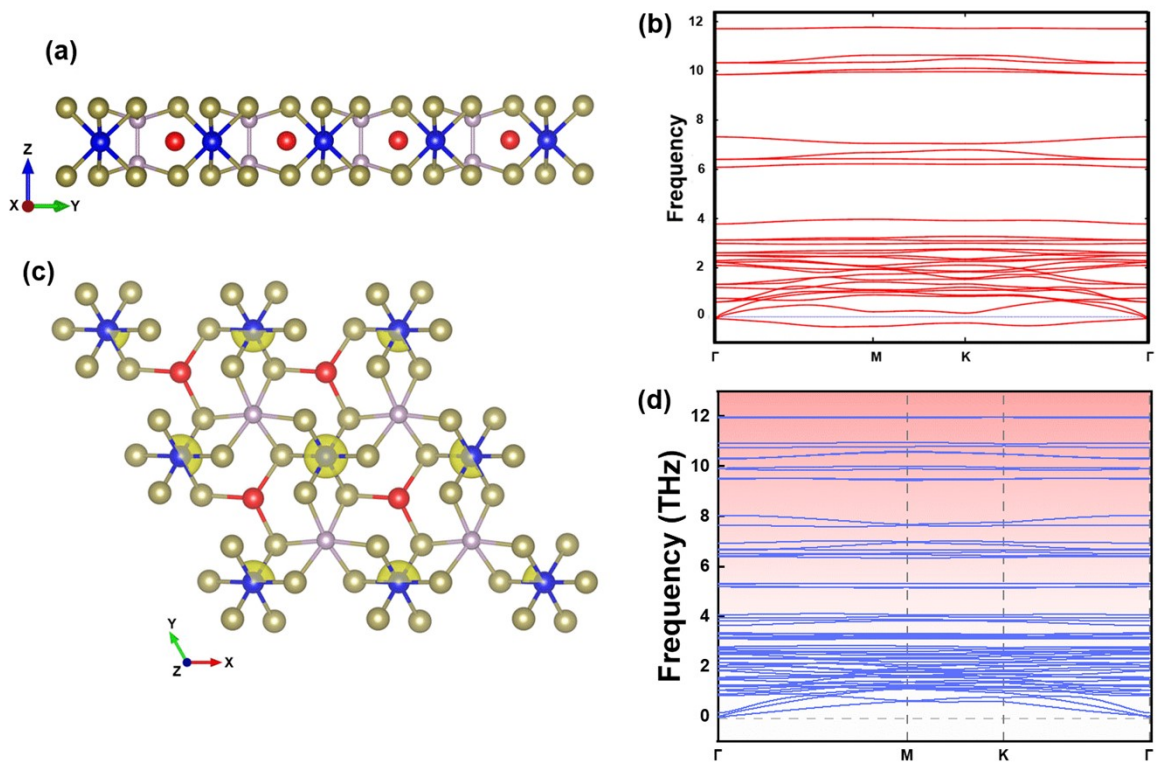

Figure S1. (a) Side view of crystal structure of monolayer  $\text{CuCrP}_2\text{Te}_6$  in PE state. (b) Phonon dispersion of PE  $\text{CuCrP}_2\text{Te}_6$ . (c) Spin charge density of monolayer  $\text{CuCrP}_2\text{Te}_6$ . (d) Phonon dispersion of AFE  $\text{CuCrP}_2\text{Te}_6$ .

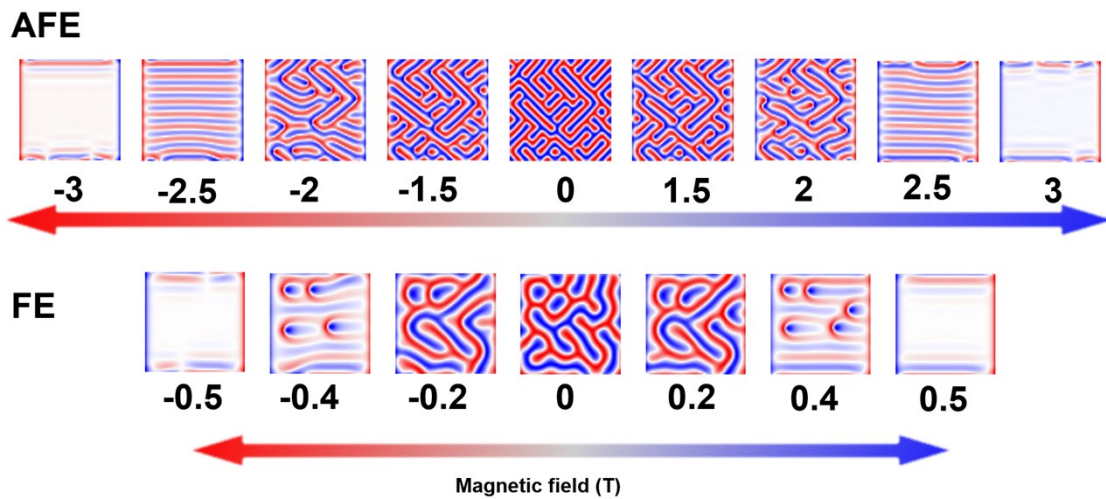

Figure S2. Spin textures diagrams as a function of in-plane external magnetic field of monolayer  $\text{CuCrP}_2\text{Te}_6$ .

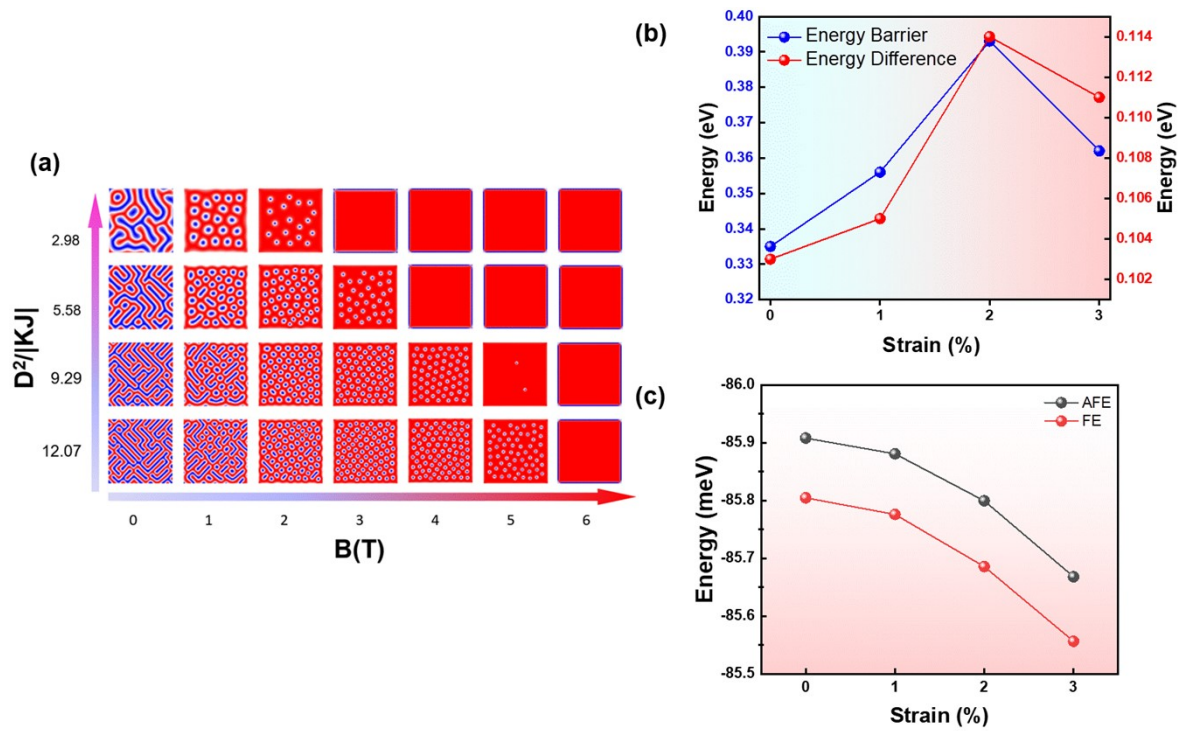

Figure S3. (a) Spin configurations as a function of external magnetic field and  $D^2/|KJ|$  at 0K. (b) Energy barriers (blue line) and energy differences (red lines) between AFE and FE of monolayer  $\text{CuCrP}_2\text{Te}_6$  under bi-axis strain, respectively. (c) The total energy of AFE (black line) and FE (red line) of monolayer  $\text{CuCrP}_2\text{Te}_6$  under strain, respectively.
